# Supplementary material for: Is retirement bliss? Assessing the impact of retirement on subjective well-being in Russia
Source: Research Square preprint supplement (doi:10.21203/rs.3.rs-8515696/v1), 2026-01-13
Supplement: Supplementary file 1 [file 7b0edfbca475959638d9a95c.docx]

1. **Supplementary Material (Online Appendix)**

**Table A1: Test for discontinuity in density of age at the pensionable age threshold**

|  | (1) | (2) | (3) |
| --- | --- | --- | --- |
|  | 0.092 | 0.093 | -0.15 |
|  | [0.926] | [0.926] | [0.878] |
|  | 10 | 10 | 10 |
|  | 15 | 20 | 10 |
|  | 735 | 735 | 735 |
|  | 1226 | 1571 | 858 |

Note: SAGE-Russia (2007-2010). Estimates proposed by Cattaneo et al. (2018). is the t-statistic for a test with the null hypothesis of equality in densities at the pensionable age threshold : . P-values for a 2-sided test in square brackets. Estimates in columns (1) use the baseline bandwidth (-10 (-5 for women) to +15 years around the threshold), while columns (2) and (3) change the upper bound to +20 and +10, respectively. and indicate the lower and upper bounds of the age distribution. The age cutoff is 55 for women and 60 for men. and are the number of observations under and above the threshold, respectively. IV_Tables_autov4_15juin

**Table A2: Using control variables as outcomes to estimate the continuity of observed characteristics around the threshold.**

|  | (1) | (2) | (3) | (4) | (5) | (6) | (7) | (8) | (9) |
| --- | --- | --- | --- | --- | --- | --- | --- | --- | --- |
|  | Rural | Married | Education: Secondary | Education: High school | Education: College or higher | Num adults in HH | Num children in HH | WHO disability score | Self-assessed pain |
| **Above threshold** | **0.022** | **-0.006** | **0.017** | **-0.020** | **0.028** | **-0.223**** | **0.004** | **-0.073** | **-0.030** |
|  | **(0.039)** | **(0.040)** | **(0.027)** | **(0.043)** | **(0.038)** | **(0.108)** | **(0.055)** | **(0.061)** | **(0.085)** |
| Female | -0.091*** | -0.280*** | -0.066*** | 0.100*** | -0.011 | -0.210*** | -0.020 | -0.025 | 0.117** |
|  | (0.023) | (0.022) | (0.018) | (0.024) | (0.021) | (0.056) | (0.031) | (0.040) | (0.048) |
| Distance from threshold | 0.001 | 0.009 | 0.010** | -0.010 | -0.000 | -0.022 | -0.005 | 0.021** | -0.004 |
|  | (0.007) | (0.006) | (0.004) | (0.007) | (0.006) | (0.020) | (0.010) | (0.009) | (0.014) |
| (Distance from threshold) * (Above threshold) | -0.003 | -0.024*** | 0.001 | -0.004 | -0.007 | -0.000 | 0.004 | 0.033*** | 0.055*** |
|  | (0.007) | (0.007) | (0.005) | (0.008) | (0.007) | (0.021) | (0.010) | (0.011) | (0.015) |
| Constant | 0.322*** | 0.881*** | 0.144*** | 0.586*** | 0.246*** | 2.719*** | 0.221*** | 2.313*** | 0.738*** |
|  | (0.037) | (0.034) | (0.026) | (0.040) | (0.036) | (0.103) | (0.050) | (0.060) | (0.079) |
| Observations | 1,961 | 1,961 | 1,961 | 1,961 | 1,961 | 1,961 | 1,961 | 1,955 | 1,959 |

Note: SAGE-Russia (2007-2010). Sample restricted to individuals -5 to +15 years from the pensionable age threshold. Estimations allow for different age trends on each side of the threshold, and control for gender, but do not include any additional control variable. Robust standard errors in parentheses. *** p<0.01, ** p<0.05, * p<0.1 IV_Tables

| **Table A3: First stage estimates. Impact of crossing the pensionable age threshold on the probability of not working.** | | | | | |
| --- | --- | --- | --- | --- | --- |
| Second stage outcome | (1) | (2) | (3) | (4) |
| Life satisf. | WHO quality of life | Emotion score | Experienced well-being |
| **Linear Age** |  |  |  |  |
| Above threshold | 0.189*** | 0.189*** | 0.188*** | 0.192*** |
|  | (0.034) | (0.034) | (0.034) | (0.034) |
| F stat for weak identification (Kleibergen-Paap rk Wald F statistic) | 30.61 | 30.61 | 30.25 | 31.57 |
| **Quadratic Age** |  |  |  |  |
| Above threshold | 0.178*** | 0.178*** | 0.177*** | 0.181*** |
|  | (0.038) | (0.038) | (0.038) | (0.039) |
| F stat for weak identification (Kleibergen-Paap rk Wald F statistic) | 21.32 | 21.32 | 21.11 | 22.06 |
| **Interaction** |  |  |  |  |
| Above threshold | 0.209*** | 0.209*** | 0.208*** | 0.212*** |
|  | (0.037) | (0.037) | (0.037) | (0.037) |
| F stat for weak identification (Kleibergen-Paap rk Wald F statistic) | 31.55 | 31.55 | 31.23 | 32.36 |
| Observations | 1,954 | 1,954 | 1,955 | 1,951 |
| Note: SAGE-Russia (2007-2010). Sample restricted to individuals -10 (-5 for women) to +15 years from the pensionable age threshold. 2SLS first stage estimates. Estimations allow for different age trends on each side of the threshold. Robust standard errors in parentheses. Stock-Yogo weak ID test Critical values: 10% maximal IV size: 16.38. *** p<0.01, ** p<0.05, * p<0.1 IV_Tables_autov4_15juin | | | | | |

| **Table A4: Evaluative and emotional well-being. Controlling for a linear function of age (sample from -10 (-5 for women) to +15 years around the threshold).** | | | | |
| --- | --- | --- | --- | --- |
|  | (1) | (2) | (3) | (4) | |
|  | Life satisfaction | WHO quality of life | Emotion score | Experienced well-being | |
| **Currently not working** | **-0.574** | **0.014** | **0.838*** | **0.621** | |
|  | **(0.377)** | **(0.297)** | **(0.434)** | **(0.423)** | |
| Control Variables | X | X | X | X | |
| Observations | 1,954 | 1,954 | 1,955 | 1,951 | |
| F stat for weak identification (Kleibergen-Paap rk Wald F statistic) | 31.55 | 31.55 | 31.23 | 32.36 | |
| Note: SAGE-Russia (2007-2010). Sample restricted to individuals -10 (-5 for women) to +15 years from the pensionable age threshold. 2SLS estimates. Estimations include the full set of covariates and control for a linear function of age. Robust standard errors in parentheses. *** p<0.01, ** p<0.05, * p<0.1 IV_Tables_autov4_15juin | | | | |

| **Table A5: Evaluative and emotional well-being. Controlling for a quadratic function of age (sample from -10 (-5 for women) to +15 years around the threshold)** | | | | | | |
| --- | --- | --- | --- | --- | --- | --- |
|  | (1) | (2) | (3) | (4) | |
|  | Life  satisfaction | WHO quality of life | Emotion score | Experienced well-being | |
| **Currently not working** | **-0.497** | **0.064** | **0.903*** | **0.915*** | |
|  | **(0.437)** | **(0.364)** | **(0.520)** | **(0.520)** | |
| Control Variables | X | X | X | X | |
| Observations | 1,954 | 1,954 | 1,955 | 1,951 | |
| F stat for weak identification (Kleibergen-Paap rk Wald F statistic) | 21.32 | 21.32 | 21.11 | 22.06 | |
| Note: SAGE-Russia (2007-2010). Sample restricted to individuals -10 (-5 for women) to +15 years from the pensionable age threshold. 2SLS estimates. Estimations include the full set of covariates and control for a quadratic function of age. Robust standard errors in parentheses. *** p<0.01, ** p<0.05, * p<0.1 IV_Tables_autov4_15juin | | | | | | |
|  |  |  |  | |  |  |

| **Table A6: Evaluative and emotional well-being. Controlling for different trends on each side of the pensionable age threshold (sample from -10 (-5 for women) to +10 years around the threshold).** | | | | | | |
| --- | --- | --- | --- | --- | --- | --- |
|  | (1) | (2) | | (3) | | (4) |
|  | Life satisfaction | WHO quality of life | | Emotion score | | Experienced well-being |
| **Currently not working** | **-0.762** | **0.042** | | **0.981*** | | **1.127*** |
|  | **(0.499)** | **(0.400)** | | **(0.570)** | | **(0.578)** |
| Control Variables | X | X | | X | | X |
| Observations | 1,586 | 1,586 | | 1,587 | | 1,583 |
| F stat for weak identification (Kleibergen-Paap rk Wald F statistic) | 18.34 | 18.34 | | 18.15 | | 18.86 |
| Note: SAGE-Russia (2007-2010). Sample restricted to individuals -10 (-5 for women) to +10 years from the pensionable age threshold. 2SLS estimates. Estimations include the full set of covariates and allow for different age trends on each side of the threshold. Robust standard errors in parentheses. *** p<0.01, ** p<0.05, * p<0.1 IV_Tables_autov4_15juin | | | | | | |
|  |  |  |  | |  |  |

| **Table A17: Evaluative and emotional well-being. Controlling for a linear function of age (sample from -10 (-5 for women) to +10 years around the threshold).** | | | | | | |
| --- | --- | --- | --- | --- | --- | --- |
|  | (1) | (2) | | (3) | | (4) |
|  | Life satisfaction | WHO quality of life | | Emotion score | | Experienced well-being |
| **Currently not working** | **-0.897** | **0.054** | | **1.057*** | | **1.256*** |
|  | **(0.569)** | **(0.431)** | | **(0.633)** | | **(0.642)** |
| Control Variables | X | X | | X | | X |
| Observations | 1,586 | 1,586 | | 1,587 | | 1,583 |
| F stat for weak identification (Kleibergen-Paap rk Wald F statistic) | 14.86 | 14.86 | | 14.69 | | 15.35 |
| Note: SAGE-Russia (2007-2010). Sample restricted to individuals -10 (-5 for women) to +10 years from the pensionable age threshold. 2SLS estimates. Estimations include the full set of covariates and control for a linear function of age. Robust standard errors in parentheses. *** p<0.01, ** p<0.05, * p<0.1 IV_Tables_autov4_15juin | | | | | | |
|  |  |  |  | |  |  |

| **Table A8: Evaluative and emotional well-being. Controlling for a quadratic function of age (sample from -10 (-5 for women) to +10 years around the threshold)** | | | | |
| --- | --- | --- | --- | --- |
|  | (1) | (2) | (3) | (4) |
|  | Life satisfaction | WHO quality of life | Emotion score | Experienced well-being |
| **Currently not working** | **-0.752** | **0.010** | **0.943** | **1.255**** |
|  | **(0.534)** | **(0.427)** | **(0.604)** | **(0.629)** |
| Control Variables | X | X | X | X |
| Observations | 1,586 | 1,586 | 1,587 | 1,583 |
| F stat for weak identification (Kleibergen-Paap rk Wald F statistic) | 15.74 | 15.74 | 15.62 | 16.27 |
| Note: SAGE-Russia (2007-2010). Sample restricted to individuals -10 (-5 for women) to +10 years from the pensionable age threshold. 2SLS estimates. Estimations include the full set of covariates and control for a quadratic function of age. Robust standard errors in parentheses. *** p<0.01, ** p<0.05, * p<0.1 IV_Tables_autov4_15juin | | | | |

| **Table A9: Evaluative and emotional well-being. Controlling for different trends on each side of the pensionable age threshold (sample from -10 (-5 for women) to +20 years around the threshold)** | | | | | |
| --- | --- | --- | --- | --- | --- |
|  | (1) | (2) | | (3) | (4) |
|  | Life satisfaction | WHO quality of life | | Emotion  score | Experienced well-being |
| **Currently not working** | **-0.482** | **-0.026** | | **0.674*** | **0.602** |
|  | **(0.316)** | **(0.270)** | | **(0.368)** | **(0.372)** |
| Control Variables | X | X | | X | X |
| Observations | 2,298 | 2,298 | | 2,299 | 2,295 |
| F stat for weak identification  (Kleibergen-Paap rk Wald F statistic) | 42.59 | 42.59 | | 42.23 | 43.56 |
| Note: SAGE-Russia (2007-2010). Sample restricted to individuals -10 (-5 for women) to +20 years from the pensionable age threshold. 2SLS estimates. Estimations include the full set of covariates and allow for different age trends on each side of the threshold. Robust standard errors in parentheses. *** p<0.01, ** p<0.05, * p<0.1 IV_Tables_autov4_15juin | | | | | |
|  |  |  |  |  |  |

| **Table A10: Evaluative and emotional well-being. Controlling for a linear function of age (sample from -10 (-5 for women) to +20 years around the threshold)** | | | | | | | | | |
| --- | --- | --- | --- | --- | --- | --- | --- | --- | --- |
|  | | (1) | | (2) | | (3) | | (4) | | |
|  | | Life satisfaction | | WHO quality of life | | Emotion score | | Experienced well-being | | |
| **Currently not working** | | **-0.467** | | **0.005** | | **0.583*** | | **0.441** | | |
|  | | **(0.287)** | | **(0.230)** | | **(0.325)** | | **(0.318)** | | |
| Control Variables | | X | | X | | X | | X | | |
| Observations | | 2,298 | | 2,298 | | 2,299 | | 2,295 | | |
| F stat for weak identification  (Kleibergen-Paap rk Wald F statistic) | | 54.84 | | 54.84 | | 54.33 | | 56.29 | | |
| Note: SAGE-Russia (2007-2010). Sample restricted to individuals -10 (-5 for women) to +20 years from the pensionable age threshold. 2SLS estimates. Estimations include the full set of covariates and control for a linear function of age. Robust standard errors in parentheses. *** p<0.01, ** p<0.05, * p<0.1 IV_Tables_autov4_15juin | | | | | | | | | |
|  |  | |  | |  | |  | |  |

| **Table A11: Evaluative and emotional well-being. Controlling for a quadratic function of age (sample from -10 (-5 for women) to +20 years around the threshold)** | | | | | | | |
| --- | --- | --- | --- | --- | --- | --- | --- |
|  | (1) | | (2) | | (3) | | (4) | |
|  | Life satisfaction | | WHO quality of life | | Emotion score | | Experienced well-being | |
| **Currently not working** | **-0.465** | | **0.082** | | **0.998**** | | **0.921*** | |
|  | **(0.410)** | | **(0.340)** | | **(0.498)** | | **(0.487)** | |
| Control Variables | X | | X | | X | | X | |
| Observations | 2,298 | | 2,298 | | 2,299 | | 2,295 | |
| F stat for weak identification (Kleibergen-Paap rk Wald F statistic) | 24.47 | | 24.47 | | 24.21 | | 25.30 | |
| Note: SAGE-Russia (2007-2010). Sample restricted to individuals -10 (-5 for women) to +20 years from the pensionable age threshold. 2SLS estimates. Estimations include the full set of covariates and control for a quadratic function of age. Robust standard errors in parentheses. *** p<0.01, ** p<0.05, * p<0.1 IV_Tables_autov4_15juin | | | | | | | |
|  | |  | |  | |  | |

| **Table A12: Evaluative and emotional well-being. Controlling for objective health measures (sample from -10 (-5 for women) to +15 years around the threshold)** | | | | |
| --- | --- | --- | --- | --- |
|  | (1) | (2) | (3) | (4) |
|  | Life satisfaction | WHO quality of life | Emotion score | Experienced Well-being |
| **Currently not working** | **-0.505** | **0.056** | **0.845*** | **0.653** |
|  | **(0.388)** | **(0.335)** | **(0.463)** | **(0.452)** |
| Distance from threshold | 0.018 | 0.001 | -0.012 | -0.013 |
|  | (0.017) | (0.015) | (0.019) | (0.020) |
| (Distance from threshold) * (Above threshold) | 0.001 | -0.003 | -0.002 | 0.007 |
| (0.014) | (0.012) | (0.015) | (0.016) |
| Female | -0.044 | -0.047 | -0.110 | -0.078 |
|  | (0.058) | (0.049) | (0.071) | (0.071) |
| Rural | -0.099* | -0.059 | -0.125** | -0.018 |
|  | (0.054) | (0.043) | (0.061) | (0.058) |
| Education Level: Secondary | 0.095 | 0.148 | 0.205 | 0.050 |
|  | (0.137) | (0.103) | (0.151) | (0.156) |
| Education Level: High school | -0.003 | 0.108 | 0.294** | 0.066 |
|  | (0.133) | (0.098) | (0.146) | (0.153) |
| Education Level: College or higher | -0.036 | 0.192* | 0.365** | 0.130 |
|  | (0.145) | (0.108) | (0.159) | (0.169) |
| Married | 0.110** | 0.046 | 0.009 | -0.068 |
|  | (0.055) | (0.045) | (0.066) | (0.065) |
| Number of adults in household | -0.011 | -0.010 | 0.059** | 0.040 |
|  | (0.024) | (0.019) | (0.026) | (0.028) |
| Number of children in household | -0.015 | -0.008 | -0.008 | -0.003 |
|  | (0.041) | (0.033) | (0.039) | (0.044) |
| WHO disability score | -0.421*** | -0.591*** | -0.548*** | -0.291*** |
|  | (0.048) | (0.043) | (0.057) | (0.058) |
| **Inpatient care since 12m** | **0.045** | **-0.076** | **-0.173**** | **-0.020** |
|  | **(0.064)** | **(0.054)** | **(0.078)** | **(0.074)** |
| **Outpatient care num 12m** | **-0.005** | **-0.016**** | **-0.002** | **-0.003** |
|  | **(0.007)** | **(0.006)** | **(0.011)** | **(0.009)** |
| Equivalent household income | -0.071 | 0.010 | 0.015 | 0.002 |
|  | (0.044) | (0.036) | (0.050) | (0.052) |
| Equivalent household income^2 | 0.001 | -0.081 | -0.007 | -0.036 |
|  | (0.082) | (0.068) | (0.094) | (0.099) |
| Moderate HH income situation | 0.348*** | 0.474*** | 0.080 | 0.131** |
|  | (0.056) | (0.046) | (0.066) | (0.060) |
| Good HH income situation | 0.545*** | 0.880*** | 0.341*** | 0.246** |
|  | (0.083) | (0.071) | (0.106) | (0.106) |
| Asset Index | 0.007 | -0.014 | 0.014 | 0.029 |
|  | (0.029) | (0.023) | (0.031) | (0.032) |
| Year = 2008 | -0.008 | -0.124** | -0.190** | -0.057 |
|  | (0.062) | (0.051) | (0.076) | (0.071) |
| Year = 2010 | 0.119 | -0.031 | -0.105 | 0.082 |
|  | (0.075) | (0.062) | (0.089) | (0.089) |
| Constant | 1.035*** | 1.117*** | 0.526* | 0.042 |
|  | (0.276) | (0.233) | (0.326) | (0.331) |
| Observations | 1,749 | 1,749 | 1,750 | 1,746 |
| F stat for weak identification  (Kleibergen-Paap rk Wald F statistic) | 29.12 | 29.12 | 28.77 | 29.93 |
| Note: SAGE-Russia (2007-2010). Sample restricted to individuals -10 (-5 for women) to +15 years from the pensionable age threshold. 2SLS estimates. Estimations allow for different age trends on each side of the threshold. Robust standard errors in parentheses. *** p<0.01, ** p<0.05, * p<0.1 IV_Tables_autov4_15juin | | | | |

**Table A13: Reduced form estimation. Evaluative and emotional well-being.**

|  | (1) | (2) | (3) | (4) |
| --- | --- | --- | --- | --- |
|  | Life satisfaction | WHO quality of life | Emotion score | Experienced well-being |
| **Above threshold** | **-0.115** | **-0.002** | **0.173**** | **0.152*** |
|  | **(0.074)** | **(0.065)** | **(0.088)** | **(0.092)** |
| Distance from threshold | 0.012 | 0.003 | 0.000 | -0.005 |
|  | (0.012) | (0.011) | (0.014) | (0.015) |
| (Distance from threshold) *  (Above threshold) | -0.003 | -0.002 | 0.007 | 0.014 |
| (0.013) | (0.012) | (0.015) | (0.016) |
| Female | 0.020 | -0.030 | -0.160*** | -0.112** |
|  | (0.044) | (0.037) | (0.051) | (0.053) |
| Rural | -0.082* | -0.052 | -0.119** | -0.055 |
|  | (0.049) | (0.041) | (0.055) | (0.053) |
| Education Level: Secondary | 0.146 | 0.170* | 0.254* | 0.014 |
|  | (0.122) | (0.093) | (0.136) | (0.136) |
| Education Level: High school | 0.093 | 0.109 | 0.247* | -0.042 |
|  | (0.116) | (0.088) | (0.129) | (0.131) |
| Education Level: College | 0.062 | 0.176* | 0.252* | -0.016 |
| or higher | (0.122) | (0.092) | (0.135) | (0.140) |
| Married | 0.086* | 0.070* | 0.095* | -0.003 |
|  | (0.046) | (0.039) | (0.056) | (0.055) |
| Number of adults in HH | 0.004 | -0.010 | 0.048** | 0.033 |
|  | (0.021) | (0.017) | (0.024) | (0.025) |
| Number of children in HH | -0.038 | -0.031 | -0.069* | -0.029 |
|  | (0.036) | (0.029) | (0.038) | (0.039) |
| WHO disability score | -0.384*** | -0.480*** | -0.443*** | -0.238*** |
|  | (0.034) | (0.031) | (0.043) | (0.044) |
| Self-assessed pain | -0.107*** | -0.177*** | -0.077*** | -0.005 |
|  | (0.026) | (0.022) | (0.028) | (0.031) |
| Equivalent HH income | -0.019 | 0.017 | -0.052 | -0.053 |
|  | (0.028) | (0.021) | (0.033) | (0.033) |
| Equivalent HH income2 | -0.098* | -0.094** | 0.119* | 0.069 |
|  | (0.054) | (0.040) | (0.064) | (0.064) |
| Moderate HH income | 0.355*** | 0.450*** | 0.025 | 0.069 |
| situation | (0.047) | (0.039) | (0.053) | (0.053) |
| Good HH income situation | 0.561*** | 0.806*** | 0.188** | 0.135 |
|  | (0.064) | (0.056) | (0.075) | (0.084) |
| Asset Index | 0.023 | -0.009 | 0.000 | 0.020 |
|  | (0.024) | (0.019) | (0.024) | (0.028) |
| Year = 2008 | -0.013 | -0.102** | -0.139** | -0.010 |
|  | (0.052) | (0.043) | (0.060) | (0.060) |
| Year = 2010 | 0.110* | 0.014 | -0.023 | 0.165** |
|  | (0.056) | (0.048) | (0.064) | (0.065) |
| Constant | 0.637*** | 0.953*** | 0.756*** | 0.310 |
|  | (0.178) | (0.149) | (0.207) | (0.220) |
| Observations | 1,954 | 1,954 | 1,955 | 1,951 |

Note: SAGE-Russia (2007-2010). Sample restricted to individuals -10 (-5 for women) to +15 years from the pensionable age threshold. OLS estimates. Estimations allow for different age trends on each side of the threshold. Robust standard errors in parentheses.

*** p<0.01, ** p<0.05, * p<0.1 IV_Tables_autov4_15juin

| **Table A14: Evaluative and emotional well-being. Controlling for different trends on each side of the pensionable age threshold (sample from -10 (-5 for women) to +15 years around the threshold).** | | | | | |
| --- | --- | --- | --- | --- | --- |
|  | (1) | (2) | (3) | (4) |
|  | Life  satisfaction | WHO quality of life | Emotion score | Experienced well-being |
| **Currently not working** | **-0.550** | **-0.014** | **0.834*** | **0.725*** |
|  | **(0.367)** | **(0.309)** | **(0.431)** | **(0.432)** |
| Distance from threshold | 0.019 | 0.003 | -0.010 | -0.014 |
|  | (0.016) | (0.014) | (0.018) | (0.019) |
| (Distance from threshold) *  (Above threshold) | 0.002 | -0.002 | -0.000 | 0.008 |
| (0.013) | (0.011) | (0.014) | (0.015) |
| Female | -0.022 | -0.031 | -0.096 | -0.056 |
|  | (0.055) | (0.046) | (0.066) | (0.067) |
| Rural | -0.089* | -0.052 | -0.107* | -0.045 |
|  | (0.051) | (0.041) | (0.057) | (0.054) |
| Education Level: Secondary | 0.191 | 0.171* | 0.187 | -0.044 |
|  | (0.130) | (0.096) | (0.145) | (0.145) |
| Education Level: High school | 0.080 | 0.109 | 0.266** | -0.025 |
|  | (0.122) | (0.087) | (0.134) | (0.137) |
| Education Level: College or higher | 0.024 | 0.175* | 0.309** | 0.035 |
|  | (0.131) | (0.094) | (0.143) | (0.149) |
| Married | 0.114** | 0.071* | 0.052 | -0.040 |
|  | (0.051) | (0.041) | (0.060) | (0.060) |
| Number of adults in HH | -0.002 | -0.010 | 0.056** | 0.041 |
|  | (0.022) | (0.017) | (0.024) | (0.026) |
| Number of children in HH HHHHHHhousehold | -0.049 | -0.031 | -0.052 | -0.014 |
|  | (0.037) | (0.029) | (0.040) | (0.041) |
| WHO disability score | -0.327*** | -0.479*** | -0.530*** | -0.312*** |
|  | (0.051) | (0.044) | (0.060) | (0.062) |
| Self-assessed pain | -0.099*** | -0.176*** | -0.089*** | -0.016 |
|  | (0.027) | (0.023) | (0.030) | (0.031) |
| Equivalent HH income | -0.065 | 0.016 | 0.019 | 0.008 |
|  | (0.043) | (0.034) | (0.049) | (0.051) |
| Equivalent HH income2 | -0.011 | -0.091 | -0.013 | -0.045 |
|  | (0.082) | (0.065) | (0.093) | (0.097) |
| Moderate HH income situation | 0.326*** | 0.449*** | 0.069 | 0.108* |
|  | (0.052) | (0.042) | (0.060) | (0.057) |
| Good HH income situation | 0.487*** | 0.804*** | 0.300*** | 0.234** |
|  | (0.083) | (0.069) | (0.098) | (0.101) |
| Asset Index | 0.006 | -0.009 | 0.026 | 0.042 |
|  | (0.027) | (0.021) | (0.029) | (0.030) |
| Year = 2008 | 0.026 | -0.101** | -0.199*** | -0.059 |
|  | (0.060) | (0.047) | (0.071) | (0.068) |
| Year = 2010 | 0.175** | 0.015 | -0.123 | 0.083 |
|  | (0.074) | (0.060) | (0.086) | (0.087) |
| Constant | 0.802*** | 0.957*** | 0.506* | 0.092 |
|  | (0.240) | (0.200) | (0.281) | (0.292) |
| Observations | 1,954 | 1,954 | 1,955 | 1,951 |
| F stat for weak identification  (Kleibergen-Paap rk Wald F statistic) | 31.06 | 31.06 | 30.75 | 31.89 |
| Note: SAGE-Russia (2007-2010). Sample restricted to individuals -10 (-5 for women) to +15 years from the pensionable age threshold. 2SLS estimates. Estimations allow for different age trends on each side of the threshold. Robust standard errors in parentheses. *** p<0.01, ** p<0.05, * p<0.1 IV_Tables_autov4_15juin | | | | | |

| **Table A15: Descriptive statistics of time use and activity-specific net affect, by gender** | | | | | | | |
| --- | --- | --- | --- | --- | --- | --- | --- |
|  | All | | Females | | Males | | P-value |
| *Panel A: Time use* | | | | | | | |
| Work | 23% |  | 19% |  | **0.287** |  | 0.001 |
| Housework | 24% |  | 32% |  | **0.118** |  | 0.000 |
| Travel | 8% |  | 5% |  | 0.110 |  | 0.119 |
| Leisure | 34% |  | 34% |  | 0.371 |  | 0.255 |
| Self-care | 11% |  | 10% |  | 0.115 |  | 0.575 |
| *Panel B: Activity-specific net affect* | | | | | | | |
|  | All | | Females | | Males | | P-value |
|  |  | *Ranking* |  | *Ranking* |  | *Ranking* |  |
| Work | -0.378 | *5* | -0.395 | *5* | -0.359 | *5* | 0.729 |
| Housework | -0.061 | *4* | -0.117 | *3* | **0.138** | *4* | 0.057 |
| Travel | -0.028 | *3* | -0.322 | *4* | **0.226** | *3* | 0.055 |
| Leisure | 0.301 | *2* | 0.259 | *2* | 0.365 | *2* | 0.182 |
| Self-care | 0.429 | *1* | 0.319 | *1* | **0.591** | *1* | 0.029 |
| Note: The average under men is bold whenever there is a significant difference between genders in a pairwise comparison (p<0.10). Time Composition averages represent the share of time spent in activity a over the reported period | | | | | | | |

| **Table A16: First stage estimates. Impact of crossing the pensionable age threshold on the probability of not working, by gender.** | | | | | | | | | |
| --- | --- | --- | --- | --- | --- | --- | --- | --- | --- |
|  | **Female** | | | | **Male** | | | | |
|  | (1) | (2) | (3) | (4) | (1) | (2) | (3) | (4) |
|  | Life  satisf. | WHO quality of life | Emotion score | Experien  ced well-being | Life  satisf. | WHO quality of life | Emotion score | Experien-ced well-being |
| **Above threshold** | 0.264*** | 0.264*** | 0.263*** | 0.266*** | 0.283*** | 0.283*** | 0.283*** | 0.286*** |
|  | (0.057) | (0.057) | (0.057) | (0.057) | (0.054) | (0.054) | (0.054) | (0.055) |
| Control variables | X | X | X | X | X | X | X | X |
| Observations | 1,735 | 1,735 | 1,736 | 1,732 | 961 | 961 | 961 | 960 |
| F stat for weak ident. (Kleibergen-Paap rk Wald F statistic) | 21.41 | 21.41 | 21.24 | 21.78 | 27.05 | 27.05 | 27.05 | 27.45 |
| Note: SAGE-Russia (2007-2010). Full sample. Estimations include the full set of covariates and allow for different age trends on each side of the threshold. Robust standard errors in parentheses. *** p<0.01, ** p<0.05, * p<0.1 Do-file: IV_tables_autov4_15juin_MALEFEM | | | | | | | | | |

**Table A17: Placebo jumps at 53 and 70 years old**

|  | (1) | (2) | (3) | (4) | |
| --- | --- | --- | --- | --- | --- |
|  | Life satisfaction | WHO quality of life | Emotion score | Experienced well-being | |
| *Panel A: 53 years old* | | | | |
| **Above threshold** | **0.036** | **-0.007** | **0.082** | **0.202** | |
|  | **(0.143)** | **(0.120)** | **(0.168)** | **(0.169)** | |
| Control variables | X | X | X | X | |
| Observations | 730 | 730 | 730 | 730 | |
| *Panel B: At 70 years old* | | | | |
| **Above threshold** | **0.059** | **0.093** | **-0.050** | **-0.020** | |
|  | **(0.073)** | **(0.060)** | **(0.088)** | **(0.091)** | |
| Control variables | X | X | X | X | |
| Observations | 1,877 | 1,877 | 1,878 | 1,874 | |

Note: SAGE-Russia (2007-2010). Reduced form estimates. Estimations include the full set of covariates and allow for different age trends on each side of the threshold. Robust standard errors in parentheses. *** p<0.01, ** p<0.05, * p<0.1 IV_Tables_autov4_15juin

**Fig. A1** Histogram of centered age

Note: SAGE-Russia (2007-2010). The figure shows the distribution of age around the statutory pensionable age threshold. Age is centered at the pensionable age threshold. The red line indicates the cutoff. IV_Tables_autov4_15juin

**Fig. A2** Evolution of the covariates around the pensionable age threshold

Note: SAGE-Russia (2007-2010). Figure A2 shows the association between each control variable and age, centered at the pensionable age threshold separately by gender. Observations represent yearly averages and a separate linear regression line is fitted under and above the threshold for the sample of individuals between -10 (-5 for women) and +15 years around the threshold.

**Fig. A3** Weekly hours worked among working individuals by distance to the pensionable age threshold

Note: SAGE-Russia (2007-2010). Figure A1 shows the association between reported weekly working hours (number of days worked*number of daily hours worked) and age, centered at the pensionable age threshold (55 for women and 60 for men) for the working population. Observations represent yearly averages and a separate linear regression line is fitted under and above the threshold for the sample of individuals between -10 (-5 for women) and +15 years around the threshold
